# Supplementary material for: Exploring the Antiviral Potential of Natural Compounds against Influenza: A Combined Computational and Experimental Approach
Source: MDPI journal article supplement (doi:10.3390/ijms25094911), 2024-04-30
Supplement: s1 [file s1]

**Table S2.** Docking energy values of the reference inhibitors.

| Literature inhibitor [24] | Chemical Structure                                                                  | Literature Vina binding energy (kcal/mol) [24] | Obtained Vina binding energy (kcal/mol) |
|---------------------------|-------------------------------------------------------------------------------------|------------------------------------------------|-----------------------------------------|
| A9                        | 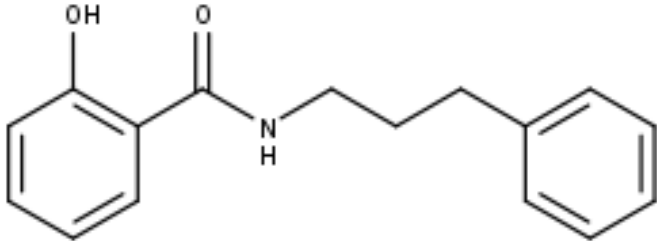  | -6.5                                           | -6.5                                    |
| A22                       |  | -6.4                                           | -6.3                                    |

#### References

24. Kleinpeter, A.B.; Jureka, A.S.; Falahat, S.M.; Green, T.J.; Petit, C.M. Structural analyses reveal the mechanism of inhibition of influenza virus NS1 by two antiviral compounds. *J Biol Chem.* 2018; 293(38):14659-14668. doi: 10.1074/jbc.RA118.004012.

#### Biological data:

A9: Walkiewicz et al. 2011. doi: 10.1099/vir.0.025015-0

A9 and A22: Jablonski et al. 2012. doi: 10.1016/j.bmc.2011.10.026
