# Supplementary material for: Exploring the Antiviral Potential of Natural Compounds against Influenza: A Combined Computational and Experimental Approach
Source: Int J Mol Sci. 2024 Apr 30;25(9):4911. doi: 10.3390/ijms25094911 (PMC11084791; doi:10.3390/ijms25094911)
Supplement: Supplementary file 1 [file ijms-25-04911-s001.zip]

Archive with 10 entries (10 files):
- Figure and Tables caption.pdf
- Figure_S1.png
- Figure_S2.png
- Figure_S3.png
- Table_S1.csv
- Table_S2.pdf
- Table_S3.csv
- Table_S4.csv
- Table_S5.csv
- Table_S6.csv
