# Supplementary material for: Exploring the Antiviral Potential of Natural Compounds against Influenza: A Combined Computational and Experimental Approach
Source: Int J Mol Sci. 2024 Apr 30;25(9):4911. doi: 10.3390/ijms25094911 (PMC11084791; doi:10.3390/ijms25094911)
Supplement: Supplementary file 1 [file ijms-25-04911-s001.zip › Table_S1.csv]

Compound	Molecular formula	AQVN	EIIP	Reference
NSC95676	C18H38N2	2.06897	0.0377699	https://doi.org/10.1128/jvi.01805-08
NSC128164	C26H40N2	2.26471	0.0809577	https://doi.org/10.1128/jvi.01805-08
CHEMBL1739790	C31H42ClN3	2.36364	0.0932357	https://www.ebi.ac.uk/chembl/g/#browse/targets/filter/_metadata.related_compounds.all_chembl_ids%3A(%22CHEMBL1739790%22%20OR%20%22CHEMBL1698845%22)
CHEMBL1608529	C18H27N3O2	2.52	0.0931334	https://www.ebi.ac.uk/chembl/g/#browse/targets/filter/_metadata.related_compounds.all_chembl_ids%3A(%22CHEMBL1608529%22)
CHEMBL1311154	C16H22FN3O2	2.59091	0.0844268	https://www.ebi.ac.uk/chembl/g/#browse/targets/filter/_metadata.related_compounds.all_chembl_ids%3A(%22CHEMBL1311154%22)
A22	C16H18N2O	2.64865	0.0734361	https://doi.org/10.1074/jbc.RA118.004012
JJ3297	C16H17NO2	2.72222	0.0548104	https://doi.org/10.1074/jbc.RA118.004012
compound 3	C23H26N2O4	2.76364	0.0423415	https://www.sciencedirect.com/science/article/pii/S0166354213001629
NSC109834	C18H22N6O	2.76596	0.0416056	https://journals.asm.org/doi/full/10.1128/jvi.01805-08
NSC125044	C17H16N2O2	2.86486	0.00735063	https://journals.asm.org/doi/full/10.1128/jvi.01805-08
compound 1	C19H16ClNO3	2.9	0.00579756	https://doi.org/10.1016%2Fj.antiviral.2013.06.005
EGCG	C22H18O11	3.37255	0.134153	https://doi.org/10.1177/1087057111431488
baicalin	C21H18O11	3.36	0.133669	https://doi.org/10.1093/jac/dkt534
