# Supplementary material for: Exploring the Antiviral Potential of Natural Compounds against Influenza: A Combined Computational and Experimental Approach
Source: Int J Mol Sci. 2024 Apr 30;25(9):4911. doi: 10.3390/ijms25094911 (PMC11084791; doi:10.3390/ijms25094911)
Supplement: Supplementary file 1 [file ijms-25-04911-s001.zip › Table_S3.csv]

Compound	Molecular formula	AQVN	EIIP	Reference
CL-385319	C15H19ClF4N2O	2.380952	0.09447	Liu S, Li R, Zhang R, Chan CC, Xi B, Zhu Z, Yang J, Poon VK, Zhou J, Chen M, Münch J, Kirchhoff F, Pleschka S, Haarmann T, Dietrich U, Pan C, Du L, Jiang S, Zheng B. CL-385319 inhibits H5N1 avian influenza A virus infection by blocking viral entry. Eur J Pharmacol. 2011 Jun 25;660(2-3):460-7. doi: 10.1016/j.ejphar.2011.04.013.
CL-61917	C15H19F3N2O	2.45	0.096376	Plotch SJ, O'Hara B, Morin J, Palant O, LaRocque J, Bloom JD, Lang SA Jr, DiGrandi MJ, Bradley M, Nilakantan R, Gluzman Y. Inhibition of influenza A virus replication by compounds interfering with the fusogenic function of the viral hemagglutinin. J Virol. 1999 Jan;73(1):140-51. doi: 10.1128/JVI.73.1.140-151.1999.
TBHQ	C10H14O2	2.538462	0.09139	Russell RJ, Kerry PS, Stevens DJ, Steinhauer DA, Martin SR, Gamblin SJ, Skehel JJ. Structure of influenza hemagglutinin in complex with an inhibitor of membrane fusion. Proc Natl Acad Sci U S A. 2008 Nov 18;105(46):17736-41. doi: 10.1073/pnas.0807142105.
BMY-27709	C17H24ClN3O2	2.553191	0.089733	Luo G, Colonno R, Krystal M. Characterization of a hemagglutinin-specific inhibitor of influenza A virus. Virology. 1996 Dec 1;226(1):66-76. doi: 10.1006/viro.1996.0628.
LY-180299	C19H24O3	2.565217	0.088206	Shen X, Zhang X, Liu S. Novel hemagglutinin-based influenza virus inhibitors. J Thorac Dis. 2013 Aug;5 Suppl 2(Suppl 2):S149-59. doi: 10.3978/j.issn.2072-1439.2013.06.14.
RO5464466	C16H26N2O3S	2.583333	0.085614	Zhu L, Li Y, Li S, Li H, Qiu Z, Lee C, Lu H, Lin X, Zhao R, Chen L, Wu JZ, Tang G, Yang W. Inhibition of influenza A virus (H1N1) fusion by benzenesulfonamide derivatives targeting viral hemagglutinin. PLoS One. 2011;6(12):e29120. doi: 10.1371/journal.pone.0029120.
RO5487624	C16H25ClN2O3S	2.583333	0.085614	Zhu L, Li Y, Li S, Li H, Qiu Z, Lee C, Lu H, Lin X, Zhao R, Chen L, Wu JZ, Tang G, Yang W. Inhibition of influenza A virus (H1N1) fusion by benzenesulfonamide derivatives targeting viral hemagglutinin. PLoS One. 2011;6(12):e29120. doi: 10.1371/journal.pone.0029120.
AL-1	C28H42O6S2	2.58974	0.0846134	Chen, J.X.; Xue, H.J.; Ye, W.C.; Fang, B.H.; Liu, Y.H.; Yuan, S.H.; Yu, P.; Wang, Y.Q. Activity of andrographolide and its derivatives against influenza virus in vivo and in vitro. Biol. Pharm. Bull. 2009, 32, 1385–1391.
arbidol	C22H25BrN2O3S	2.740741	0.049395	Leneva IA, Russell RJ, Boriskin YS, Hay AJ. Characteristics of arbidol-resistant mutants of influenza virus: implications for the mechanism of anti-influenza action of arbidol. Antiviral Res. 2009 Feb;81(2):132-40. doi: 10.1016/j.antiviral.2008.10.009.
curcumin	C21H20O6	2.978723	0.03587	Chen, D. Y., Shien, J. H., Tiley, L., Chiou, S. S., Wang, S. Y., Chang, T. J., ... & Hsu, W. L. (2010). Curcumin inhibits influenza virus infection and haemagglutination activity. Food Chemistry, 119(4), 1346-1351.
EGCG	C22H18O11	3.37255	0.134153	Nakayama M, Suzuki K, Toda M, Okubo S, Hara Y, Shimamura T. Inhibition of the infectivity of influenza virus by tea polyphenols. Antiviral Res. 1993 Aug;21(4):289-99. doi: 10.1016/0166-3542(93)90008-7.
