# Supplementary material for: Exploring the Antiviral Potential of Natural Compounds against Influenza: A Combined Computational and Experimental Approach
Source: Int J Mol Sci. 2024 Apr 30;25(9):4911. doi: 10.3390/ijms25094911 (PMC11084791; doi:10.3390/ijms25094911)
Supplement: Supplementary file 1 [file ijms-25-04911-s001.zip › Table_S4.csv]

Rescoring of the ligand docking poses
	A9	A22	ZINC12895341	ZINC12895343
Gauss 1 term	81.48004	80.19254	82.07615	98.15279
Gauss 2 term	763.15528	756.00973	945.68276	867.32751
Repulsion term	2.10974	2.32761	1.58023	1.44272
Hydrophobic term	63.1693	62.9091	55.46238	74.84751
Hydrogen term	2.23754	2.29006	0.68033	0
Vina energy (kcal/mol)	-6.49584	-6.31628	-6.25313	-6.65337
Docking energy is calculated via the following equation:
deltaG=-0.0356*Gauss1-0.00516*gauss2+0.84*repulsion-0.00351*hydrophobic term-0.587*hydrogen term
Where,
Gauss1(d) = exp(-d/0.5Å)^2
Gauss2(d)= exp(-(d-3Å)/2Å)^2
repulsion(d)={d^2, if d<0; 0, if d?0}
d – atom-atom surface distance (O. Trott, A.J. Olson, J. Comput. Chem. 31 (2010) 455-461.)
