# Supplementary material for: Exploring the Antiviral Potential of Natural Compounds against Influenza: A Combined Computational and Experimental Approach
Source: Int J Mol Sci. 2024 Apr 30;25(9):4911. doi: 10.3390/ijms25094911 (PMC11084791; doi:10.3390/ijms25094911)
Supplement: Supplementary file 1 [file ijms-25-04911-s001.zip › Table_S5.csv]

Interaction scheme between NS1 effector domain inhibitor binding pocket residues and ligands (X depicts the presence of hydrophobic , Y hydrogen bond interaction)
Aminoacid residue	A9	A22	ZINC12895341	ZINC12895343
Arg108	Y	Y	X	X
Lys110	X	X	X	X
Val117	X	X	X	X
Leu119	X	X	X	X
Val180	X		X	X
Gly183			X	X
Trp187	X	X		X
