# Supplementary material for: Exploring the Antiviral Potential of Natural Compounds against Influenza: A Combined Computational and Experimental Approach
Source: Int J Mol Sci. 2024 Apr 30;25(9):4911. doi: 10.3390/ijms25094911 (PMC11084791; doi:10.3390/ijms25094911)
Supplement: Supplementary file 1 [file ijms-25-04911-s001.zip › Table_S6.csv]

Calculated absorption, distribution, metabolism, elimination, and toxicity (ADMET) parameters of the compounds.
Compound	MW	RB	DM	MV	DHB	AHB	PSA	logP	logS	PCaco	PM	%HOA	VRF	VRT	QPlogBB	CNS MPO
ZINC12895341	320.433	7	5.2	1117.298	2	2.5	44.552	4.249	-4.818	1300.699	3	100	0	0	-0.601	3.78
ZINC12895343	320.433	7	5.264	1096.865	2	2.5	47.501	4.163	-3.853	1442.176	3	100	0	0	-0.428	3.78
A9	255.316	6	5.24	918.417	1	2.25	55.105	3.928	-4.536	1614.877	2	100	0	0	-0.604	4.18
A22	254.331	6	2.644	927.474	2	2.5	59.141	3.927	-4.309	1359.698	3	100	0	0	-0.686	4.42
MW: Molecular weight; RB: Number of rotatable bonds; DM: computed dipole moment; MV: total solvent-accessible volume; DHB: estimated number of hydrogen-bond donors; AHB: estimated number of hydrogen-bond acceptors; PSA: van der Waals surface area of polar nitrogen and oxygen atoms and carbonyl carbon atoms; logP: predicted octanol/water partition coefficient; logS: predicted aqueous solubility; P…
